# Supplementary material for: Instrumental neutron activation analysis (INAA) of zinc concentrations in scalp hair and fingernails samples of Algerian females with breast cancer
Source: publisher site journal article supplement (doi:10.1515/ract-2021-1069), 2021-11-02
Supplement: Supplementary file 1 [file j_ract-2021-1069_suppl.docx]

**Supplementary information**

**(Reviewer #1 & 2)**

| **N°** | **Normal subjects Code** | **Age** | **[Zinc]** | |
| --- | --- | --- | --- | --- |
| **Hair** | **Fingernails** |
| 1 | T/C/15 | 26 | 324 ± 42 | 108 ± 7 |
| 2 | T01 | 27 | 125 ± 2 | 157 ± 9 |
| 3 | T04 | 27 | 153 ± 16 | 99 ± 2 |
| 4 | T/C/14 | 27 | 301 ± 41 | 197 ± 12 |
| 5 | T/OP/26 | 28 | 792 ± 39 | 134 ± 7 |
| 6 | T08 | 31 | 148 ± 2 | 153 ± 2 |
| 7 | T/OM/13 | 32 | 178 ± 20 | 122 ± 9 |
| 8 | T03 | 34 | 160 ± 3 | 104 ± 2 |
| 9 | T06 | 46 | 216 ± 2 | 117 ± 3 |
| 10 | T/OP/18 | 48 | 616 ± 60 | 112 ± 11 |
| 11 | T/OP/19 | 48 | 225 ± 11 | 247 ± 24 |
| 12 | T/OM/20 | 51 | 187 ± 12 | 141 ± 9 |
| 13 | T/OM/21 | 51 | 216 ± 22 | 141 ± 15 |
| 14 | T/OM/17 | 53 | 166 ± 20 | 147 ± 11 |
| 15 | T/C/05 | 55 | 161± 26 | 89 ± 6 |
| 16 | T/OP/10 | 55 | 192 ± 24 | 129 ± 12 |
| 17 | T/C/04 | 57 | 256 ± 36 | 188 ±12 |
| 18 | T07 | 66 | 143 ± 2 | 141 ± 2 |
| 19 | T05 | 69 | 134 ± 2 | 182 ± 31 |
| 20 | T02 | 72 | 119 ± 2 | 117 ± 1 |

| **N°** | **Breast cancer patients Code** | **Age** | **[Zinc]** | |
| --- | --- | --- | --- | --- |
| **Hair** | **Nails** |
| 1 | M/C/21 | 30 | 655 ± 84 | 150 ±10 |
| 2 | M/C/4 | 31 | 242 ± 28 | 128±11 |
| 3 | M/C/11 | 32 | 236 ± 23 | 158±10 |
| 4 | M/C/14 | 32 | 167 ±19 | 182±14 |
| 5 | M/C/5 | 33 | 191± 22 | 123 ±14 |
| 6 | M/C/09 | 33 | 199 ± 20 | 126 ±14 |
| 7 | MO12 | 34 | 145 ± 2 | 139 ± 3 |
| 8 | M/C/17 | 34 | 290 ± 40 | 151±10 |
| 9 | M/C/2 | 35 | 198 ± 22 | 152±14 |
| 10 | M/C/15 | 37 | 361± 67 | 117±7 |
| 11 | M/C/23 | 38 | 442 ±20 | 122±8 |
| 12 | M/C/10 | 40 | 279 ±12 | 128± 9 |
| 13 | MO4 | 41 | 451 ± 3 | 103 ± 6 |
| 14 | M/C/1 | 41 | 375 ±40 | 154±2 |
| 15 | MO1 | 43 | 135 ± 2 | 117 ± 2 |
| 16 | M/C/12 | 44 | 500± 15 | 237±11 |
| 17 | M/C/19 | 44 | 151± 25 | 140±9 |
| 18 | M/C/24 | 44 | 806 ± 10 | 92±6 |
| 19 | M/C/22 | 46 | 321± 43 | 130±9 |
| 20 | M/C/20 | 47 | 174±28 | 125±8 |
| 21 | MO5 | 48 | 264 ± 3 | 215 ± 5 |
| 22 | M/C/13 | 48 | 340 ± 64 | 170 ±17 |
| 23 | M/C/3 | 49 | 529 ± 32 | 147±19 |
| 24 | MO3 | 51 | 123 ± 1 | 153 ± 5 |
| 25 | M/C/7 | 51 | 323 ± 34 | 119±14 |
| 26 | MO13 | 51 | 266 ± 2 | 141 ± 4 |
| 27 | M/C/16 | 52 | 161 ± 20 | 134±9 |
| 28 | MO7 | 53 | 82 ± 2 | 131 ± 2 |
| 29 | MO8 | 55 | 173 ± 21 | 183 ± 1 |
| 30 | M/C/8 | 55 | 128 ± 17 | 197±11 |
| 31 | M/C/6 | 56 | 127 ±19 | 156 ±11 |
| 32 | MO9 | 56 | 667 ± 3 | 112 ± 3 |
| 33 | MO14 | 56 | 150 ± 1 | 105 ± 2 |
| 34 | MO15 | 58 | 148 ± 2 | 151 ± 2 |
| 35 | MO6 | 59 | 151 ± 2 | 150 ± 2 |
| 36 | MO11 | 59 | 127 ± 2 | 139 ± 6 |
| 37 | MO10 | 66 | 215 ± 2 | 75 ± 2 |
| 38 | MO16 | 66 | 107 ± 2 | 139 ± 3 |
| 39 | MO2 | 71 | 143 ± 2 | 125 ± 6 |
| 40 | M/C/18 | 72 | 131 ± 7 | 276±16 |
